# Supplementary material for: Position 34 of tRNA is a discriminative element for m5C38 modification by human DNMT2
Source: PubMed Central journal article supplement — Nucleic Acids Res. 2021 Dec 6;49(22):13045–61. doi: 10.1093/nar/gkab1148 (PMC8682788; doi:10.1093/nar/gkab1148), 2021-12-06
Supplement: gkab1148_supplemental_file.pdf [file gkab1148_supplemental_file.pdf]

## Supplementary Figures and Tables

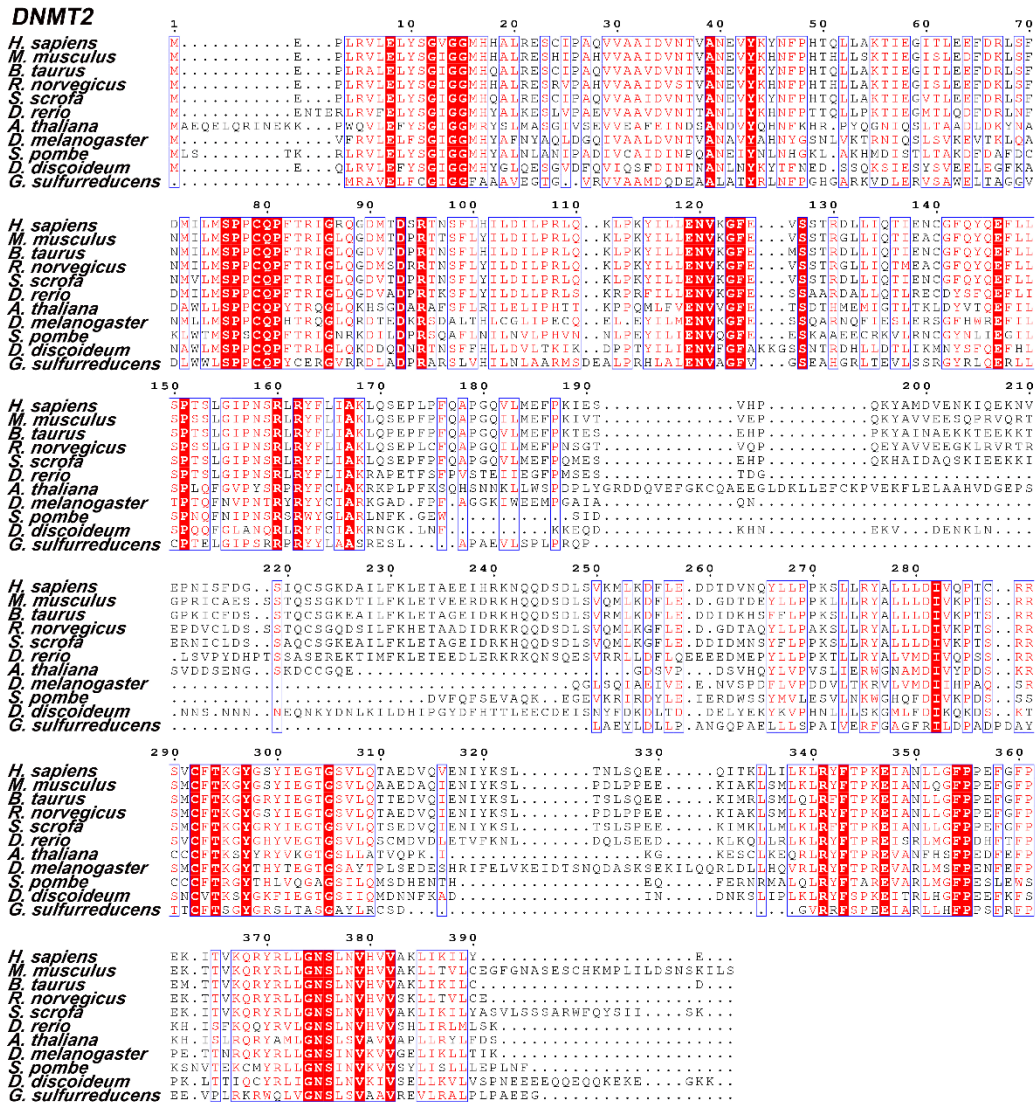

### Supplementary Figure 1. Sequence alignment of Dnmt2s from different species.

*H. sapiens*, *Homo sapiens*; *M. musculus*, *Mus musculus*; *B. taurus*, *Bos taurus*; *R. norvegicus*, *Rattus norvegicus*; *S. scrofa*, *Sus scrofa*; *D. rerio*, *Danio rerio*; *A. thaliana*, *Arabidopsis thaliana*; *D. melanogaster*, *Drosophila melanogaster*; *S. pombe*, *Schizosaccharomyces pombe*; *D. discoideum*, *Dictyostelium discoideum*; *G. sulfurreducens*, *Geobacter sulfurreducens*.

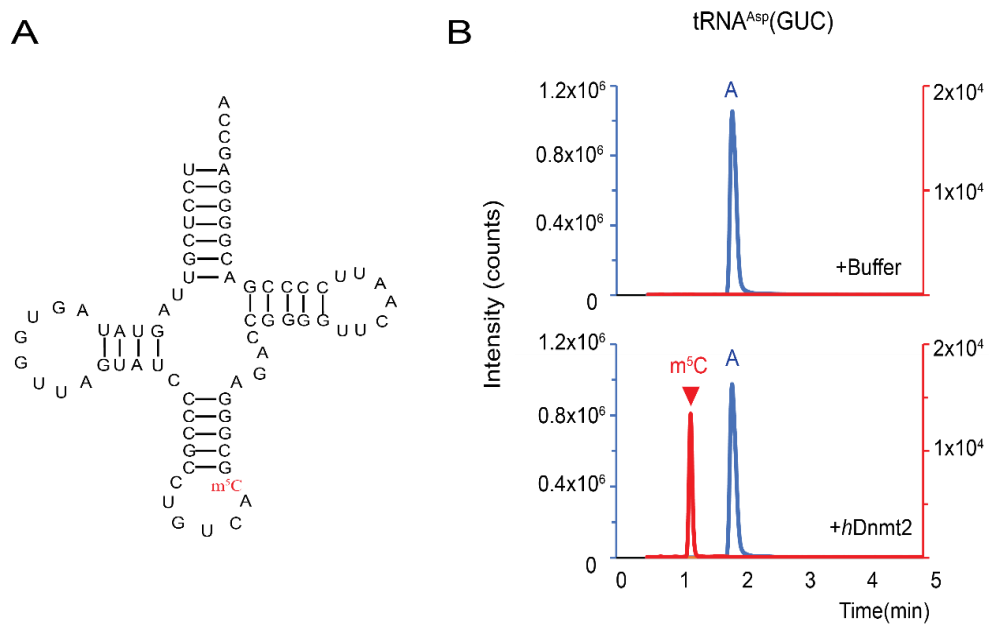

**Supplementary Figure 2. Identification of the m<sup>5</sup>C modification for tRNA<sup>Asp</sup>(GUC) by hDnmt2 *in vitro*.**

(A) The secondary structure of tRNA<sup>Asp</sup>(GUC). (B) UPLC-MS/MS analysis of m<sup>5</sup>C (Q1/Q3 =258.1/126.1) of tRNA<sup>Asp</sup>(GUC) after incubation with or without hDnmt2.

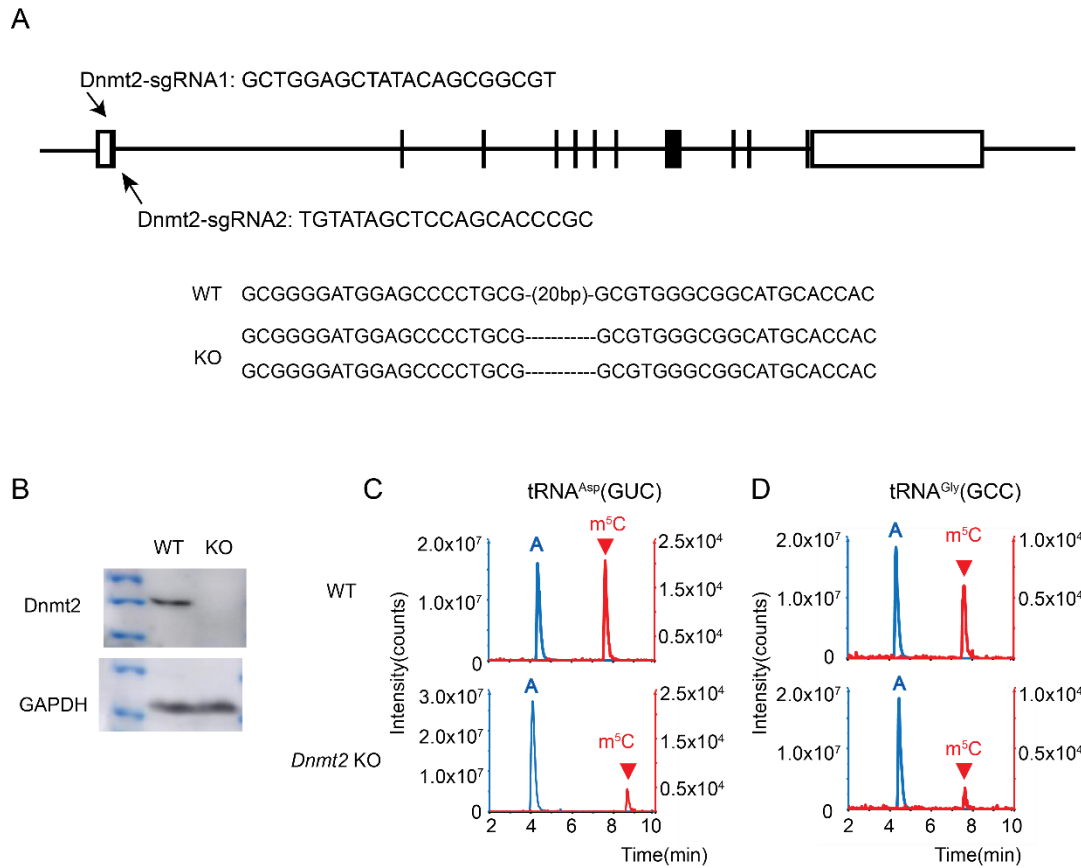

**Supplementary Figure 3. Knockout of *Dnmt2* leads to a significant decrease in the abundance of m<sup>5</sup>C on tRNA<sup>Gly</sup>(GCC) and tRNA<sup>Asp</sup>(GUC).**

(A) Schematic diagram of *Dnmt2* and target sites of mutations introduced by the CRISPR-Cas9 system in HEK293T cells. Shaded and open boxes indicate coding regions and untranslated regions of exons, respectively. Lines indicate introns. For h*Dnmt2*, two sgRNA sequences for targeting the first exon are noted. Sequences of both alleles of *Dnmt2* in the KO cell line are aligned. Deleted nucleotides are indicated as dashed lines. (B) The western blotting to show the knockout efficiency of *Dnmt2*. UPLC-MS/MS analysis of m<sup>5</sup>C (Q1/Q3 =258.1/126.1) of tRNA<sup>Asp</sup>(GUC) (C) and tRNA<sup>Gly</sup>(GCC) (D), which were isolated from wild-type and *Dnmt2* knockout 293T cell lines.

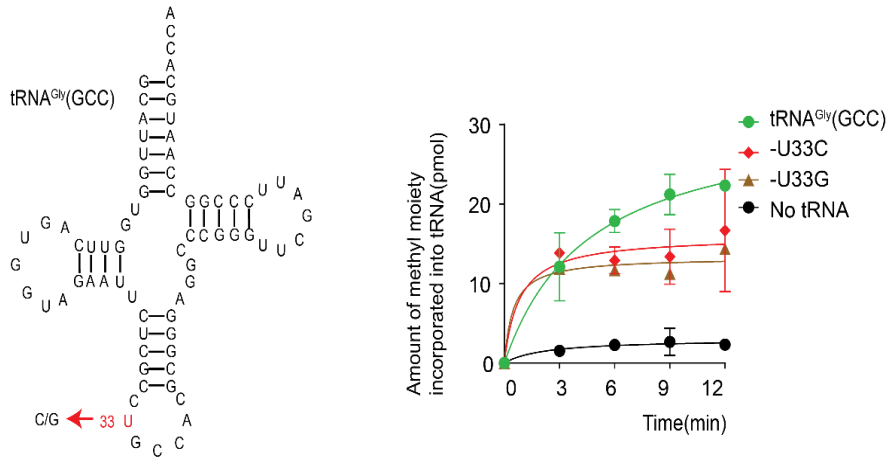

**Supplementary Figure 4. U33 is not recognized by hDnmt2.**

The capacity of tRNA<sup>Gly</sup>(GCC)-U33C and -U33G mutants to be methylated by hDnmt2. Error bars represent the standard errors of three independent experiments.

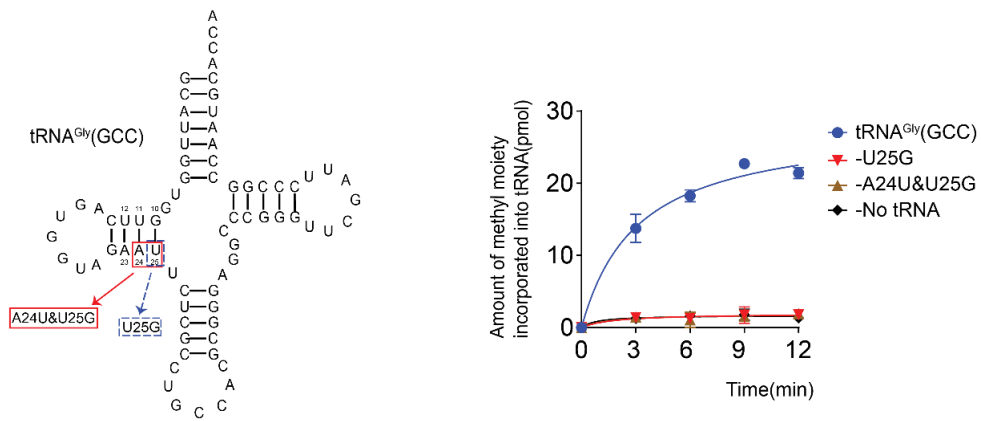

**Supplementary Figure 5. D-stem is involved in the substrate recognition of hDnmt2.**

The capacity of tRNA<sup>Gly</sup>(GCC)-U25G and -A24U&U25G to be methylated by hDnmt2. Error bars represent the standard errors of three independent experiments

## Supplementary Tables

**Supplementary Table 1. The PCR primers used for each genes in the plasmid construction.**

| Genes              | plasmid  | Primer forward          | Primer reverse          |
|--------------------|----------|-------------------------|-------------------------|
| Human              | pET28a   | CGCGGATCCATGGAGCCCCTGCG | CCGCTCGAGTTCATATAAGATTT |
| <i>Dnmt2</i>       |          | GGTGCTGGAGCTATAACA      | TGATTAGTTTAGCTACTAC     |
| <i>M. musculus</i> | pET28a   | AGCAAATGGGTCGCGGATCCATG | TGGTGGTGGTGGTGCTCGAGAG  |
| <i>Dnmt2</i>       |          | GAACCTCTGCGTGTCTCT      | ATAGAATCTTGAATTAC       |
| <i>ADAT2</i>       | pRSFduet | ACAGCCAGGATCCGAATTCGGAG | CATTATGCGGCCGCAAGCTTTCA |
|                    |          | GCGAAGGCGGCACCCAA       | AGATTTCTGACATTCT        |
| <i>ADAT3</i>       | pRSFduet | AAGAAGGAGATACATATGATCC  | GTTTCTTTACCAGACTCGAGCTA |
|                    |          | TCTGCTCCCGTCTCTG        | CGTGTCGGGGTCCAGCC       |

**Supplementary Table 2. The sequences of thirteen C38-containing tRNAs.**

| tRNAs                     | Sequence                                                                                  |
|---------------------------|-------------------------------------------------------------------------------------------|
| tRNA <sup>Ala</sup> (AGC) | GGGGAAUUAGCUCAAGUGGUAGAGCGCUUGCUUAGC<br>ACGCAAGAGGUAGUGGGAUCGAUGCCCACAUUCUCC<br>ACCA      |
| tRNA <sup>Ala</sup> (UGC) | GGGGAUGUAGCUCAGUGGUAGAGCGCAUGCUUUGCA<br>CGUAUGAGGCCCGGGUUCAAUCCCGGCAUCUCCA<br>CCA         |
| tRNA <sup>Asp</sup> (GUC) | UCCUCGUUAGUAUAGUGGUGAGUAUCCCCGCCUGUC<br>ACGCGGGAGACCGGGGUUCGAUUCCCGACGGGGAG<br>CCA        |
| tRNA <sup>Glu</sup> (CUC) | UCCUUGGUGGUCUAGUGGUUAGGAUUCGGCGCUCUC<br>ACCGCCGCGGCCCGGGUUCGAUUCCCGGUCAGGGAA<br>CCA       |
| tRNA <sup>Glu</sup> (UUC) | UCCCAUAUGGUCUAGCGGUUAGGAUUCUGGUUUUC<br>ACCAGGUGGCCCGGGUUCGACUCCCGGUAUGGGAA<br>CCA         |
| tRNA <sup>Gly</sup> (GCC) | GCAUUGGUGGUUCAGUGGUAGAAUUCUCGCCUGCCA<br>CGCGGGAGGCCCGGGUUCGAUUCCCGGCCAAUGCAC<br>CA        |
| tRNA <sup>Gly</sup> (CCC) | GCAUUGGUGGUUCAGUGGUAGAAUUCUCGCCUCCCA<br>CGCGGGAGACCGGGUUCAAUUCCCGGCCAAUGCAC<br>CA         |
| tRNA <sup>His</sup> (GUG) | GCCGUGAUCGUAUAGUGGUUAGUACUCUGCGUUGUG<br>GCCGCAGCAACCUCGGUUCGAAUCCGAGUCACGGCA<br>CCA       |
| tRNA <sup>Leu</sup> (AAG) | GGUAGCGUGGCCGAGCGGUCUAAGGCGCUGGAUUAA<br>GGUCCAGUCUCUUCGGGGGCGUGGGUUCGAAUCCC<br>ACCGCUGCCA |
| tRNA <sup>Leu</sup> (UAG) | GGUAGCGUGGCCGAGCGGUCUAAGGCGCUGGAUUAA<br>GGUCCAGUCUCUUCGGAGGCGUGGGUUCGAAUCCC               |

|                           |                                                                                      |
|---------------------------|--------------------------------------------------------------------------------------|
|                           | ACCGCUGCCACCA                                                                        |
| tRNA <sup>Val</sup> (AAC) | GUUUCCGUAGUGUAGUGGUUAUCACGUUCGCCUAAC<br>ACGCGAAAGGUCCCCGGUUCGAAACCGGGCGGAAAC<br>ACCA |
| tRNA <sup>Val</sup> (CAC) | GUUUCCGUAGUGUAGUGGUUAUCACGUUCGCCUCAC<br>ACGCGAAAGGUCCCCGGUUCGAAACCGGGCGGAAAC<br>ACCA |
| tRNA <sup>Val</sup> (UAC) | GGUUCCAUAGUGUAGUGGUUAUCACGUCUGCUUUAC<br>ACGCAGAAGGUCCUGGGUUCGAGCCCCAGUGGAACC<br>ACCA |

---

The 38<sup>th</sup> nucleotides of these tRNAs are marked as red.

**Supplementary Table 3. The biotinylated DNA probes for fishing tRNAs.**

| tRNAs                     | probes                                  |
|---------------------------|-----------------------------------------|
| tRNA <sup>Asp</sup> (GUC) | 5'biotin-TGGCTCCCCGTCGGGGAATCGAACCCCGGT |
| tRNA <sup>Gly</sup> (GCC) | 5'biotin-CGAGAATTCTACCACTGAACCACCAATGC  |
